# Supplementary material for: Detection of Glacier Calving Margins with Convolutional Neural Networks: A Case Study
Source: Preprints.org preprint supplement (doi:10.20944/preprints201811.0529.v1), 2018-11-21
Supplement: Supplementary file 1 [file supplementary]

# Supplementary Materials: Detection of Glacier Calving Margins with Convolutional Neural Networks: A Case Study

Yara Mohajerani <sup>1\*</sup>, Michael Wood <sup>1</sup>, Isabella Velicogna, <sup>1,2</sup> and Eric Rignot <sup>1,2</sup>

**Table S1.**

Architecture of the neural network corresponding to Figure 2 in the main text. "Conv" denotes a convolutional layer with ReLU activation a  $3 \times 3$  kernel, unless specified otherwise as in layer 28. All layers are as described in Methods.

| Layer | Type                                                    | Output Size                |
|-------|---------------------------------------------------------|----------------------------|
| 1     | Input                                                   | $240 \times 152 \times 1$  |
| 2-4   | Conv $\rightarrow$ Dropout (0.2) $\rightarrow$ Conv     | $240 \times 152 \times 32$ |
| 5     | MaxPool ( $2 \times 2$ )                                | $120 \times 76 \times 32$  |
| 6-8   | Conv $\rightarrow$ Dropout (0.2) $\rightarrow$ Conv     | $120 \times 76 \times 64$  |
| 9     | MaxPool ( $2 \times 2$ )                                | $60 \times 38 \times 64$   |
| 10-12 | Conv $\rightarrow$ Dropout (0.2) $\rightarrow$ Conv     | $60 \times 38 \times 128$  |
| 13    | MaxPool ( $2 \times 2$ )                                | $30 \times 19 \times 128$  |
| 14-16 | Conv $\rightarrow$ Dropout (0.2) $\rightarrow$ Conv     | $30 \times 19 \times 256$  |
| 17    | Upsample ( $2 \times 2$ ) and Concatenate with layer 12 | $60 \times 38 \times 256$  |
| 18-20 | Conv $\rightarrow$ Dropout (0.2) $\rightarrow$ Conv     | $60 \times 38 \times 128$  |
| 21    | Upsample ( $2 \times 2$ ) and Concatenate with layer 8  | $120 \times 76 \times 128$ |
| 22-24 | Conv $\rightarrow$ Dropout (0.2) $\rightarrow$ Conv     | $120 \times 76 \times 64$  |
| 25    | Upsample ( $2 \times 2$ ) and Concatenate with layer 4  | $240 \times 152 \times 64$ |
| 26-28 | Conv $\rightarrow$ Dropout (0.2) $\rightarrow$ Conv     | $240 \times 152 \times 32$ |
| 27    | Conv                                                    | $240 \times 152 \times 3$  |
| 28    | Conv ( $1 \times 1$ - Sigmoid)                          | $240 \times 152 \times 1$  |
| 29    | Flatten for dynamic weighting                           | $36480 \times 1$           |

**Figure S1.**

The outputs and corresponding errors of the Neural Network (NN), Sobel filter, and manual technique for 10 test images from Helheim Glacier.

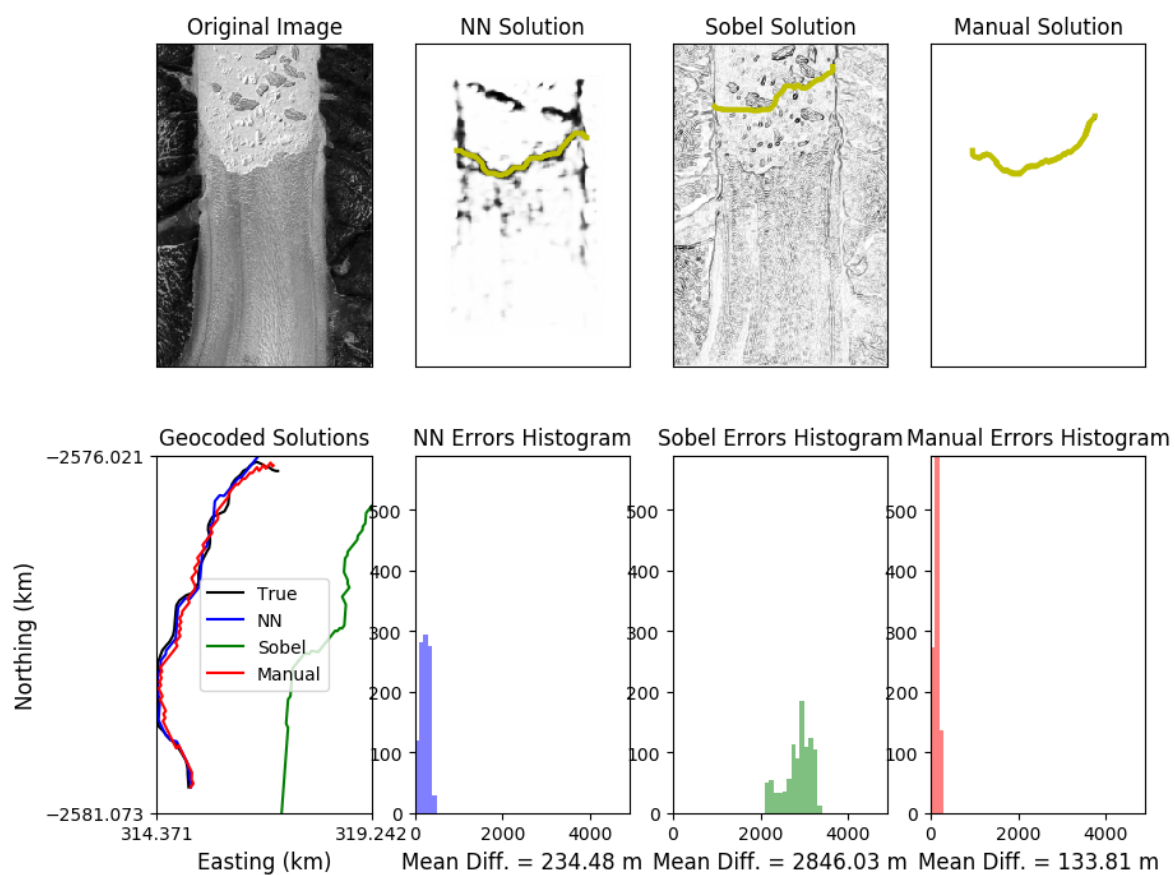

Figure S1.1. Landsat 5 - 19890629 - 20170202

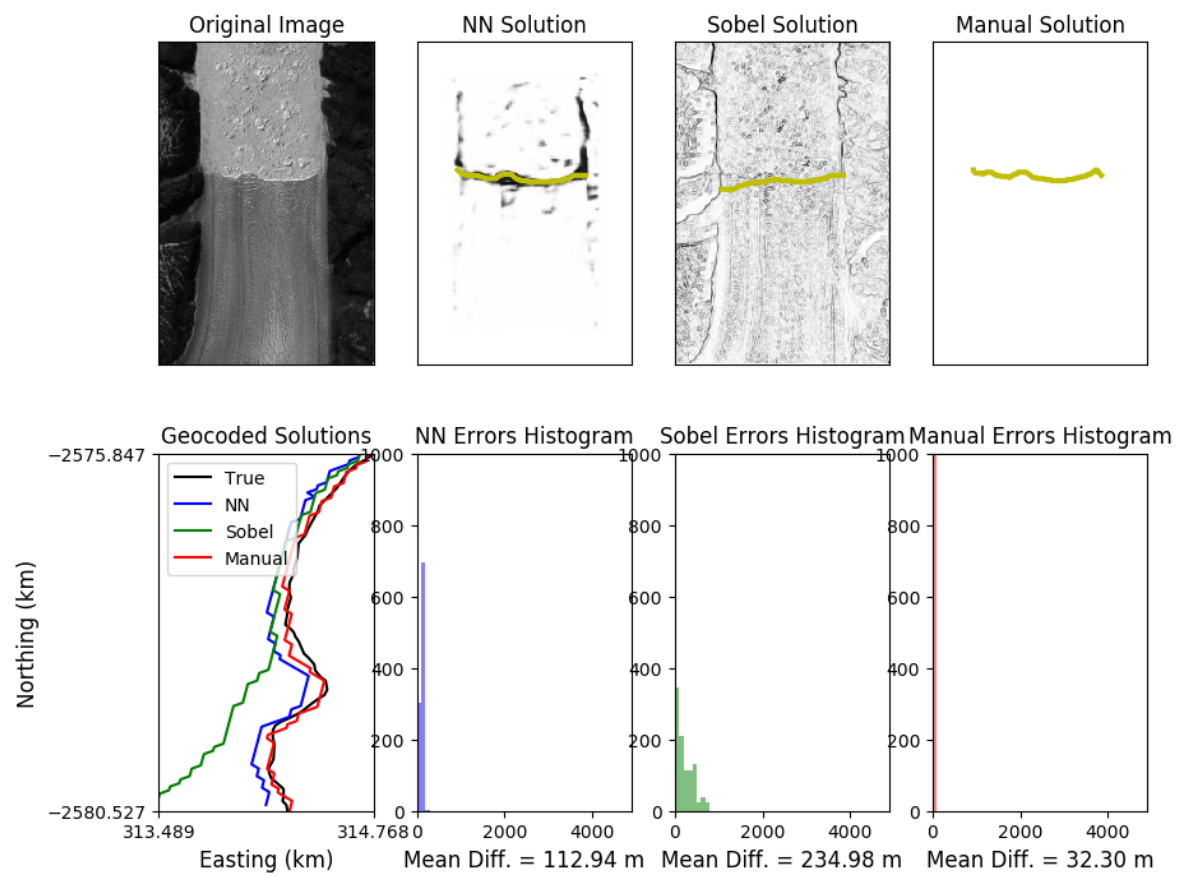

**Figure S1.2.** Landsat 5 - 19940830 - 20170113

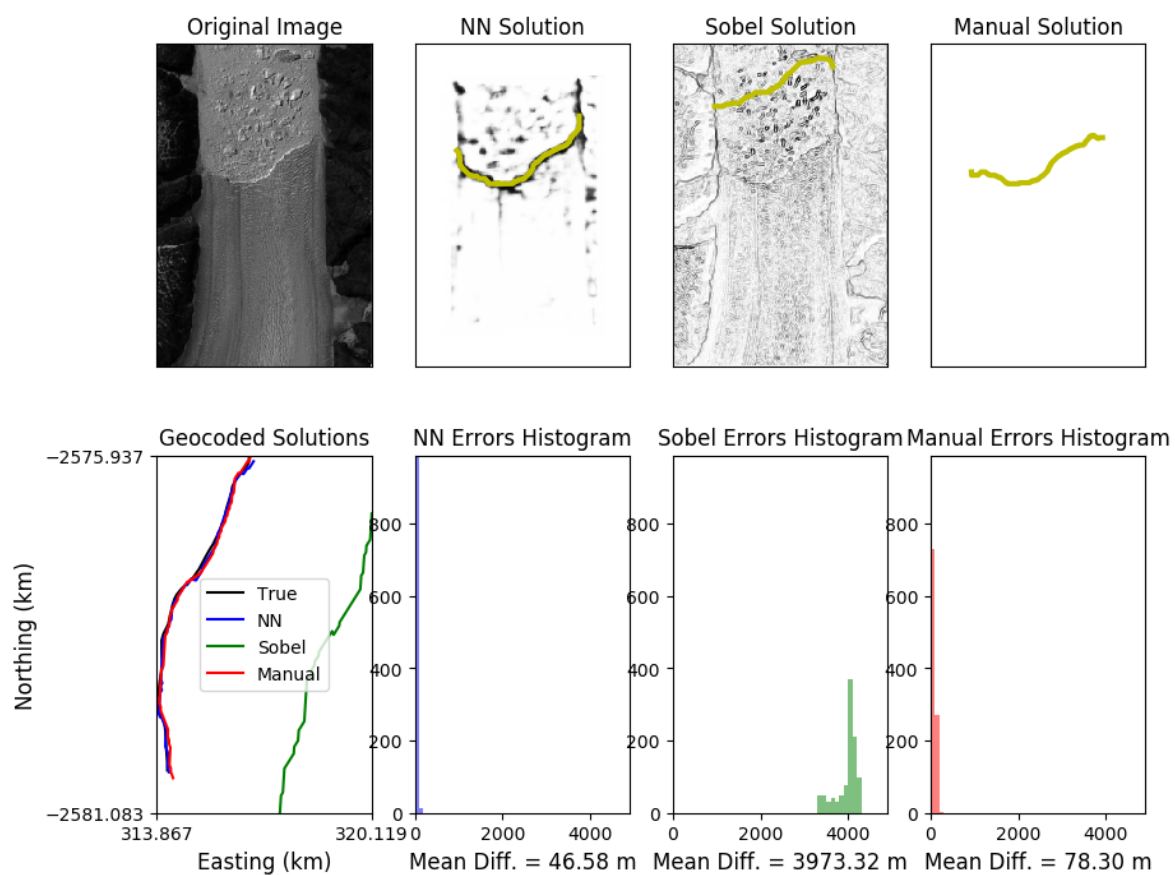

Figure S1.3. Landsat 5 - 19850908 - 20170218

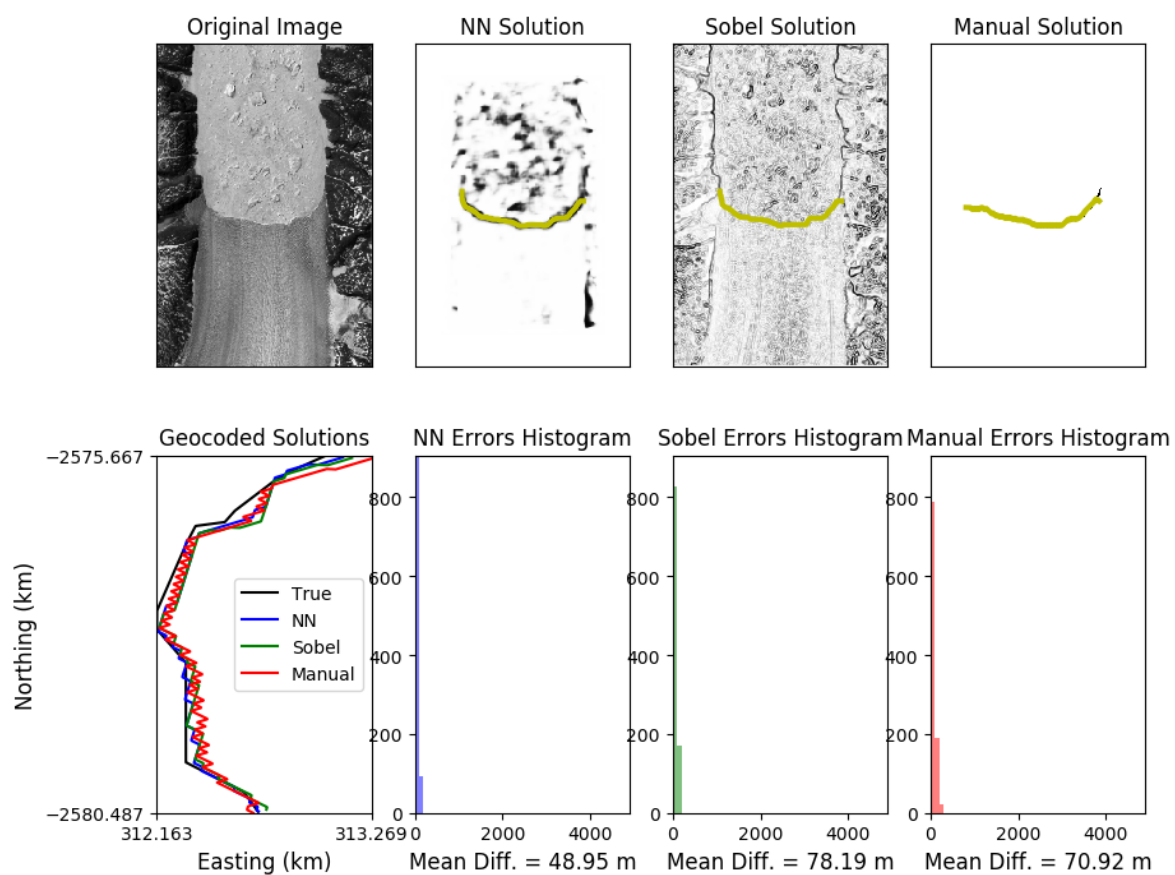

Figure S1.4. Landsat 7 - 20020625 0 20170129

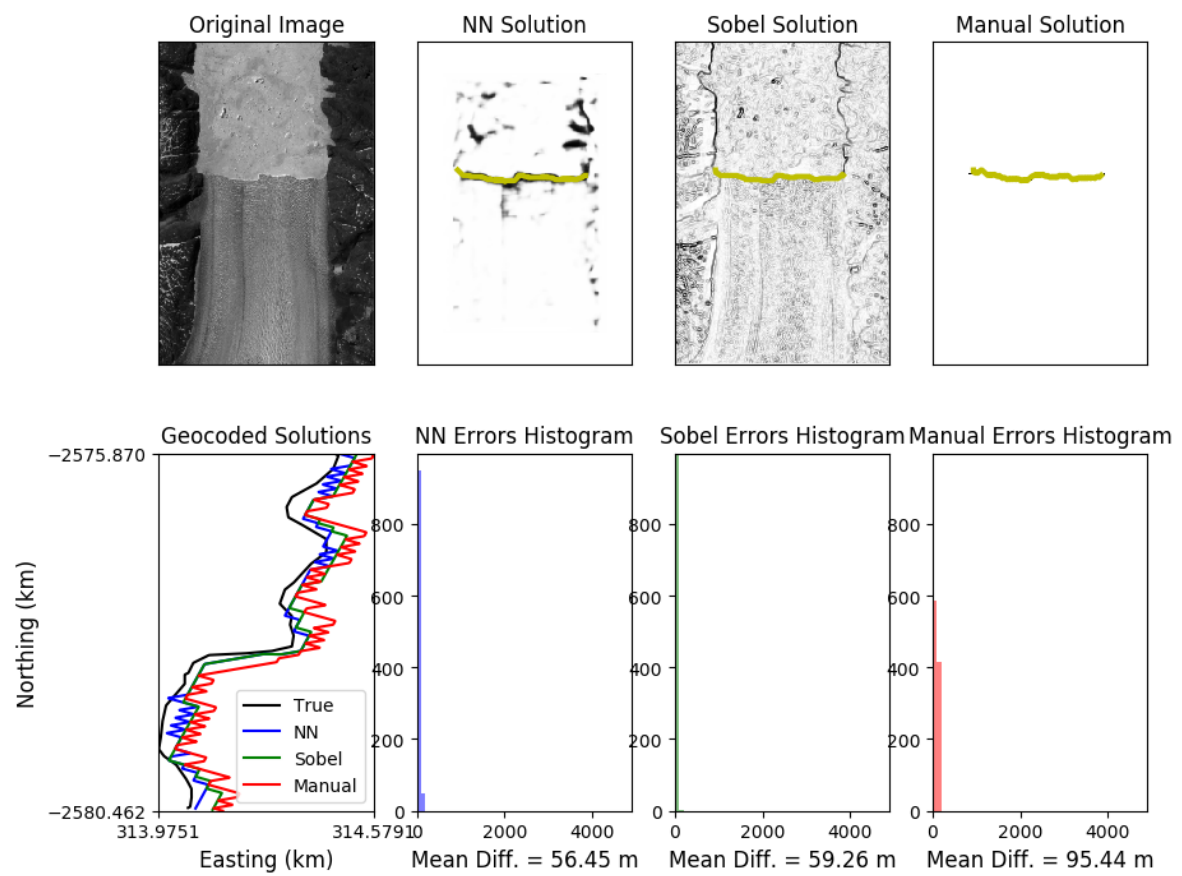

Figure S1.5. Landsat 7 - 20000721 - 20170210

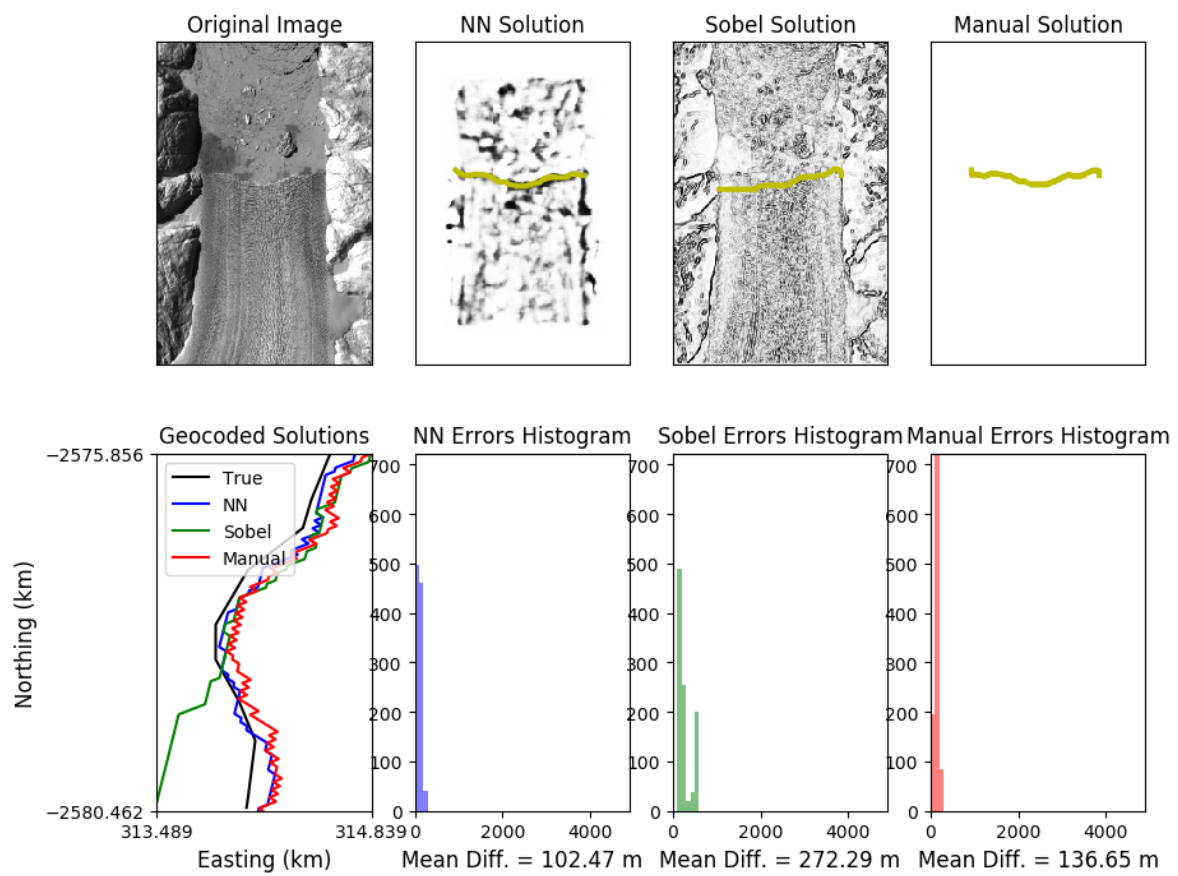

Figure S1.6. Landsat 7 - 20000331 - 20170212

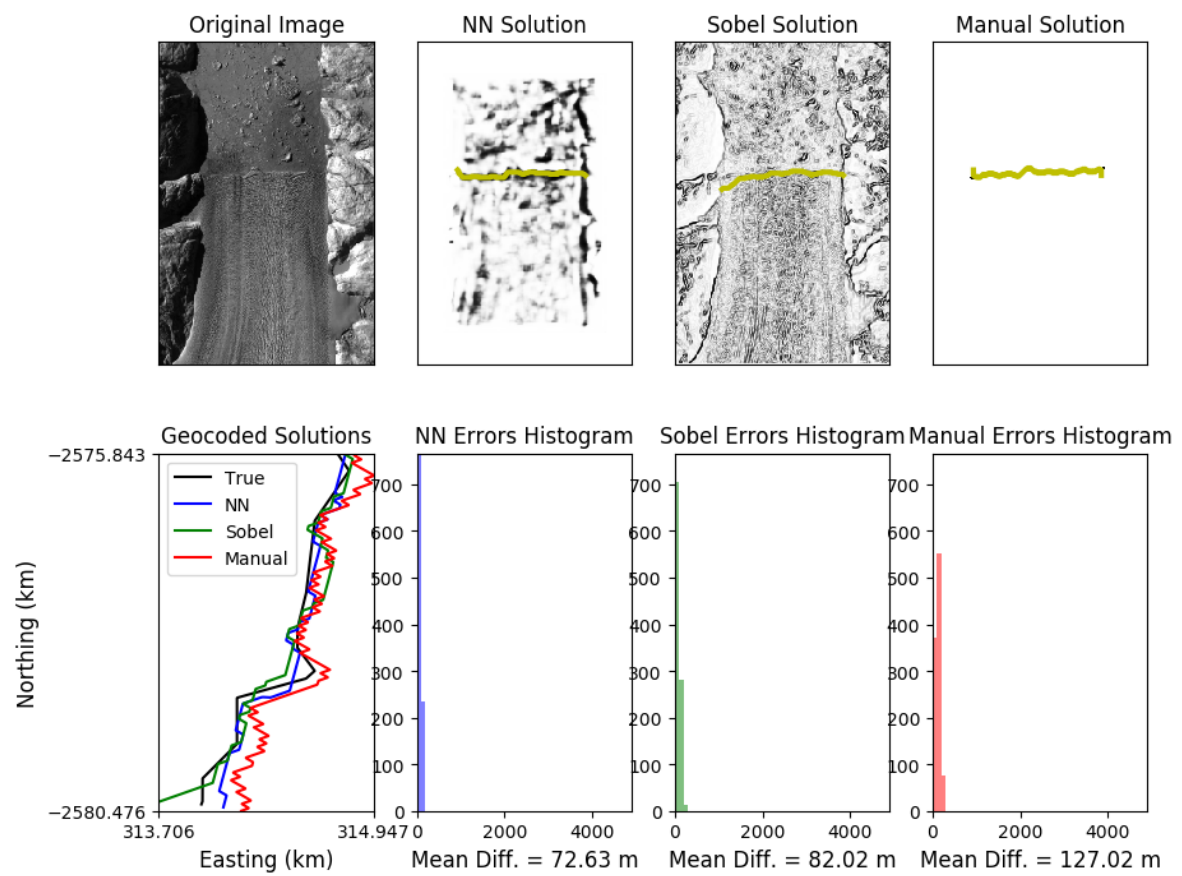

Figure S1.7. Landsat 7 - 20010318 - 20170206



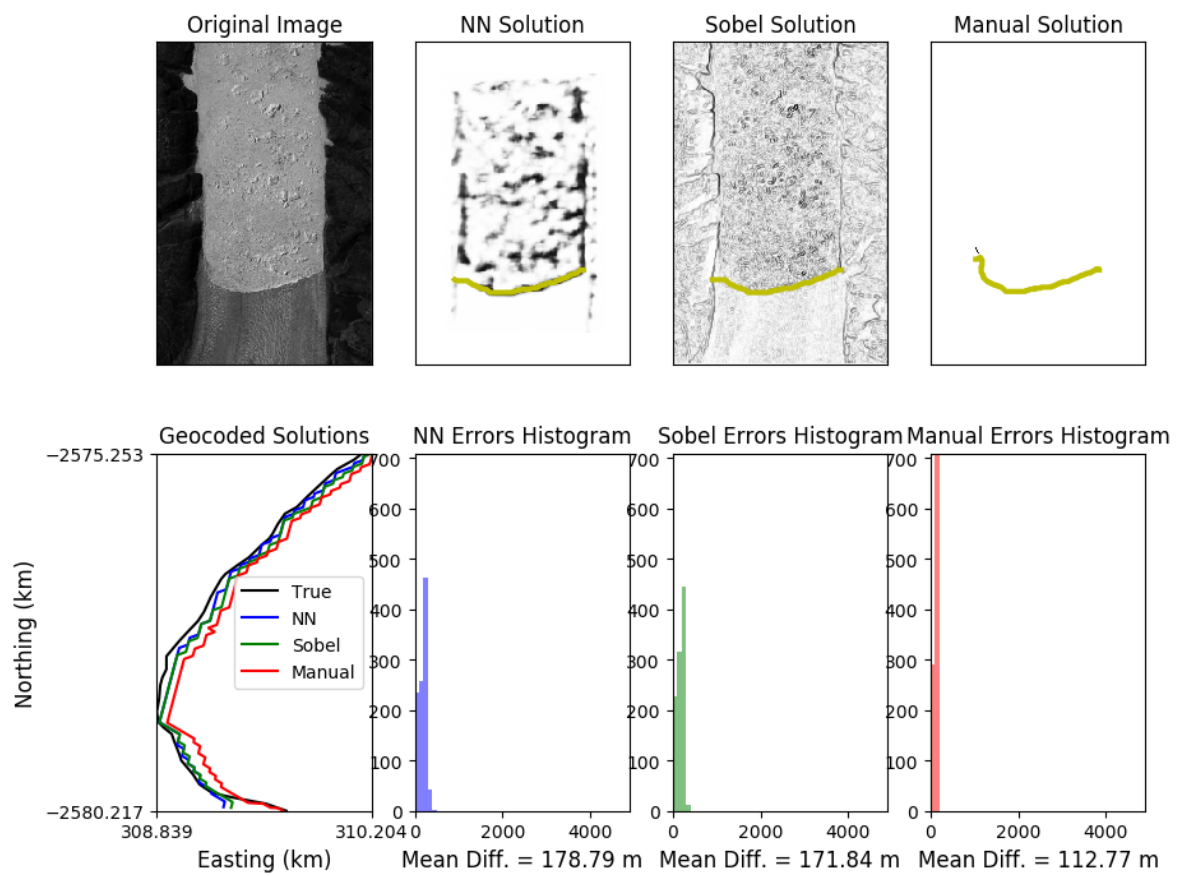

Figure S1.8. Landsat 8 - 20160725 - 20170322

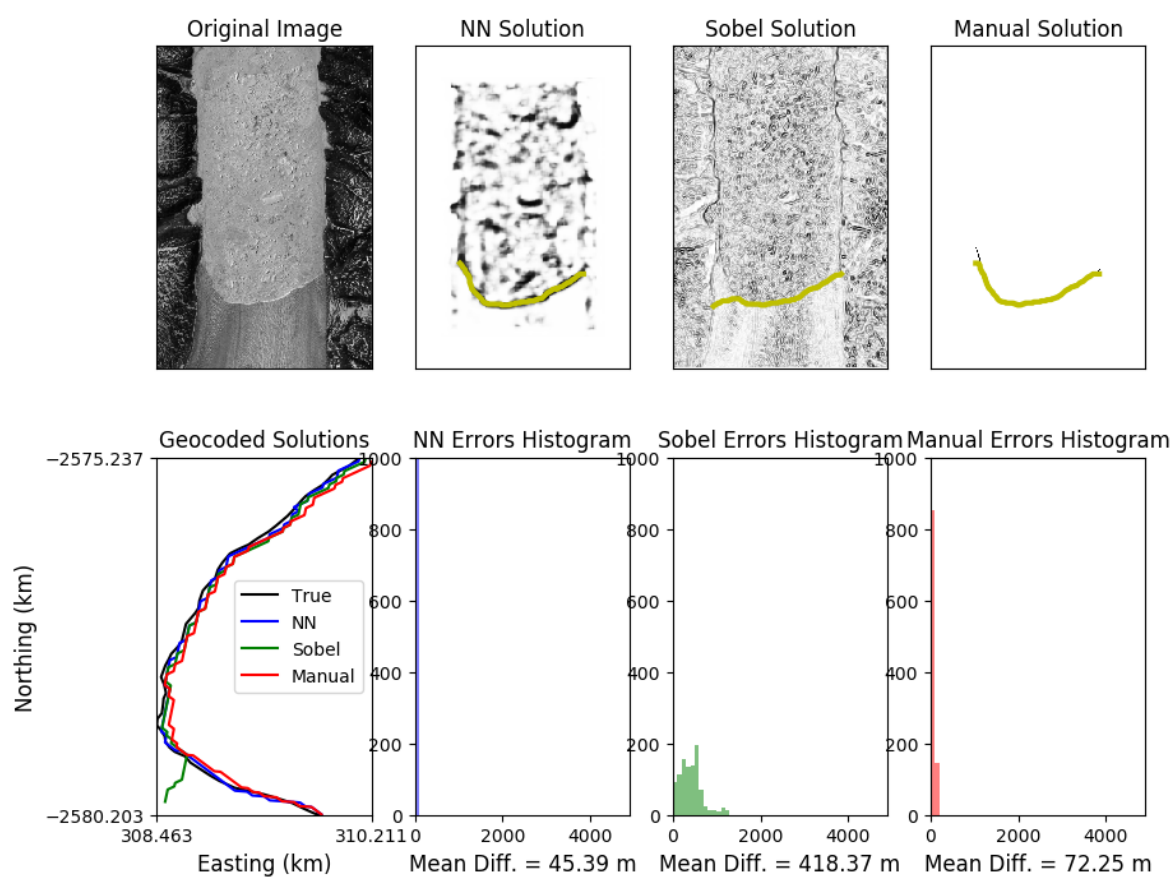

Figure S1.9. Landsat 8 - 20150707 - 20170407

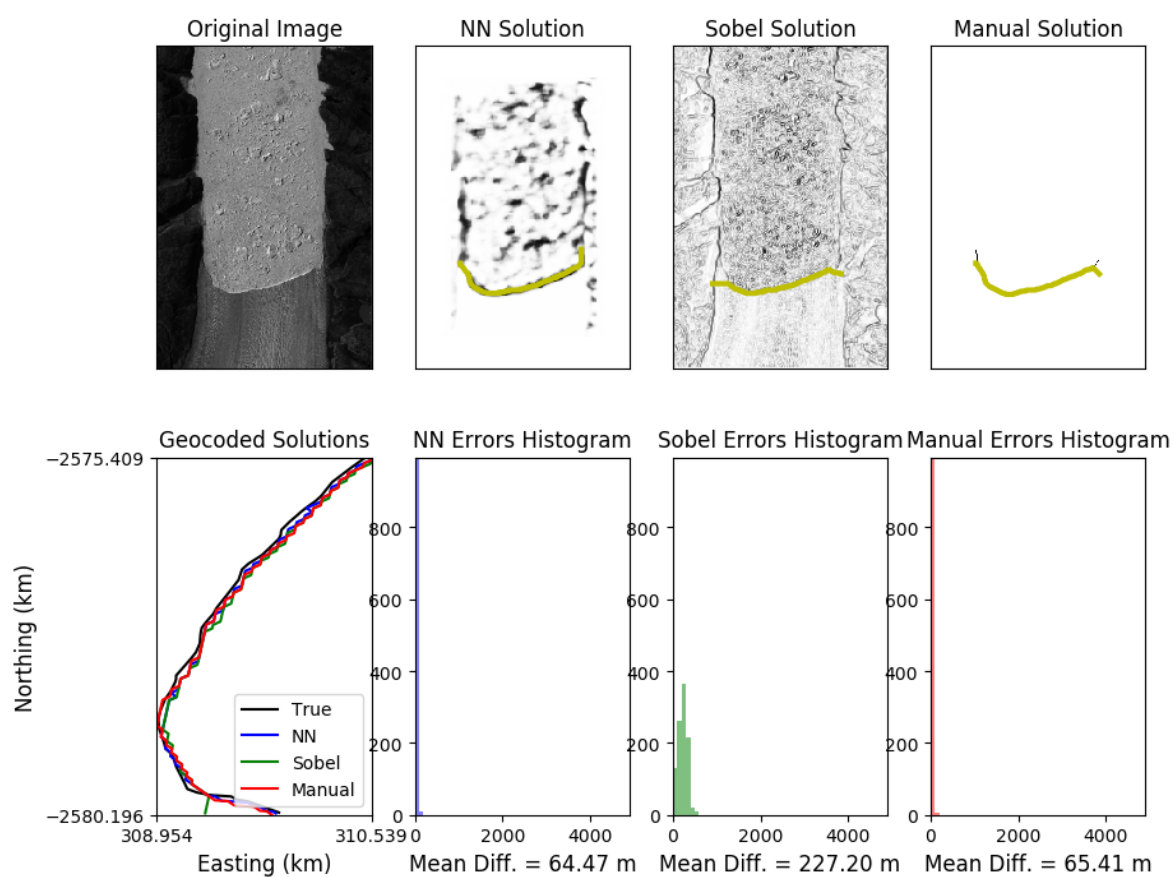

Figure S1.10. Landsat 8 - 20140821 - 20170420
